# Supplementary material for: Treated wastewater reuse for crop irrigation: a comprehensive health risk assessment
Source: Royal Society of Chemistry journal article supplement (doi:10.1039/d4va00274a), 2024-11-25
Supplement: d4va00274a1.pdf [file d4va00274a1.pdf]

Calibration Parameters of Heavy Metals (Arsenic, Cadmium, Copper, Lead, Zinc)

---

Method: As As HCL (Flame)

Cal. Set 4

Curve Fit = New Rational

Calibration Mode = Concentration

Characteristic Conc = 0.65 mg/L

r = 1.0000

Conc = A

---

$$(0.00391 \times A \times A - 0.00048 \times A + 0.00684)$$

|            |        |        |       |       |
|------------|--------|--------|-------|-------|
| CAL ZERO   | 0.00m  | 0.0009 | 0.14  | -0.14 |
| STANDARD 1 | 5.00m  | 0.0342 | 5.05  | -0.05 |
| STANDARD 2 | 10.00m | 0.0682 | 10.07 | -0.07 |
| STANDARD 3 | 20.00m | 0.1370 | 20.16 | -0.16 |
| Reslope    | 10.00m | 0.0677 | 9.99  | 0.01  |

Method: Cd 1 (Flame)

Cal. Set 3

Curve Fit = New Rational

Calibration Mode = Concentration

Characteristic Conc = 0.013 mg/L

r = 0.9998

Conc = A

---

$$(-7.23249 \times A \times A + 0.59079 \times A + 0.32155)$$

|            |        |         |        |        |
|------------|--------|---------|--------|--------|
| CAL ZERO   | 0.000m | -0.0004 | -0.001 | 0.001  |
| STANDARD 1 | 0.100m | 0.0324  | 0.096  | 0.004  |
| STANDARD 2 | 0.200m | 0.0677  | 0.203  | -0.003 |
| STANDARD 3 | 0.300m | 0.0929  | 0.292  | 0.008  |
| Reslope    | 0.200m | 0.0685  | 0.206  | -0.006 |

Method: Cu 1 (Flame)

Cal. Set 3

Curve Fit = New Rational  
Calibration Mode = Concentration  
Characteristic Conc = 0.030 mg/L  
r = 1.0000

Conc = A

-----  
(-1.49781 x A x A + 0.08522 x A + 0.14722)

|            |        |         |        |        |
|------------|--------|---------|--------|--------|
| CAL ZERO   | 0.000m | -0.0009 | -0.006 | 0.006  |
| STANDARD 1 | 0.200m | 0.0295  | 0.202  | -0.002 |
| STANDARD 2 | 0.300m | 0.0447  | 0.306  | -0.006 |
| STANDARD 3 | 0.500m | 0.0726  | 0.507  | -0.007 |
| Reslope    | 0.300m | 0.0441  | 0.302  | -0.002 |

Method: Pb 1 (Flame)

Cal. Set 3

Curve Fit = New Rational  
Calibration Mode = Concentration  
Characteristic Conc = 0.09 mg/L  
r = 0.9999

Conc = A

-----  
(0.23585 x A x A - 0.02990 x A + 0.04871)

|            |       |        |      |       |
|------------|-------|--------|------|-------|
| CAL ZERO   | 0.00m | 0.0005 | 0.01 | -0.01 |
| STANDARD 1 | 0.50m | 0.0243 | 0.50 | 0.00  |
| STANDARD 2 | 1.00m | 0.0475 | 0.99 | 0.01  |
| STANDARD 3 | 2.00m | 0.0961 | 2.00 | 0.00  |
| Reslope    | 1.00m | 0.0477 | 0.99 | 0.01  |

Method: Zn 1 (Flame)

Cal. Set 4

Curve Fit = New Rational

Calibration Mode = Concentration

Characteristic Conc = 0.007 mg/L

r = 0.9999

Conc = A

-----  
(-0.19111 x A x A - 0.06766 x A + 0.59780)

|            |        |         |        |        |
|------------|--------|---------|--------|--------|
| CAL ZERO   | 0.000m | -0.0008 | -0.001 | 0.001  |
| STANDARD 1 | 0.100m | 0.0594  | 0.102  | -0.002 |
| STANDARD 2 | 0.200m | 0.1196  | 0.207  | -0.007 |
| STANDARD 3 | 0.300m | 0.1723  | 0.302  | -0.002 |
| STANDARD 4 | 0.500m | 0.2806  | 0.506  | -0.006 |
| STANDARD 5 | 1.000m | 0.5135  | 1.019  | -0.019 |
| Reslope    | 0.500m | 0.2762  | 0.498  | 0.002  |
