# Supplementary material for: Treated wastewater reuse for crop irrigation: a comprehensive health risk assessment
Source: Royal Society of Chemistry journal article supplement (doi:10.1039/d4va00274a), 2024-11-25
Supplement: d4va00274a2.pdf [file d4va00274a2.pdf]

Pharmaceuticals and Personal Care Products (PPCPs) Analysed in Biomass

|     | MI     | NAME                                   | OTHER NAME                 | CAS#       | LOQ  | LOD  | Uncertainty | Accreditation | Description                                      |
|-----|--------|----------------------------------------|----------------------------|------------|------|------|-------------|---------------|--------------------------------------------------|
|     |        |                                        |                            |            | ng/l | ng/l | %           |               |                                                  |
| 1.  | FE3575 | acebutolol                             |                            | 37517-30-9 | 1    | 0.3  | 35*         | A             | <i>beta blocker</i>                              |
| 2.  | FE3580 | acesulfame                             |                            | 33665-90-6 | 2    | 0.7  | 35*         | A             | <i>sugar substitute</i>                          |
| 3.  | FE3140 | atenolol                               |                            | 29122-68-7 | 1    | 0.3  | 35*         | A             | <i>beta blocker</i>                              |
| 4.  | FE2023 | benzotriazole 1-methyl                 | 1-methyl-1-H-benzotriazole | 13351-73-0 | 5    | 1.5  | 35*         | A             | <i>benzotriazole</i>                             |
| 5.  | FE3099 | bezafibrate                            |                            | 41859-67-0 | 1    | 0.3  | 35*         | A             | <i>fibrate</i>                                   |
| 6.  | FE3147 | bisoprolol                             |                            | 66722-44-9 | 1    | 0.3  | 35*         | A             | <i>beta blocker</i>                              |
| 7.  | FB0040 | bisphenol A                            |                            | 80-05-7    | 20   | 7    | 35*         | A             | <i>alkylphenol</i>                               |
| 8.  | FB0041 | bisphenol B                            |                            | 77-40-7    | 5    | 1.5  | 35*         | A             | <i>alkylphenol</i>                               |
| 9.  | FB0044 | bisphenol S                            |                            | 80-09-1    | 1    | 0.3  | 35*         | A             | <i>alkylphenol</i>                               |
| 10. | FE3595 | butylparaben                           |                            | 94-26-8    | 1    | 0.3  | 35*         | A             | <i>cosmetic and pharmaceutical preservatives</i> |
| 11. | FE3100 | caffeine                               |                            | 58-08-2    | 2    | 0.7  | 35*         | A             | <i>stimulant</i>                                 |
| 12. | FE1395 | carbamazepine                          |                            | 298-46-4   | 1    | 0.3  | 35*         | A             | <i>antiepileptic</i>                             |
| 13. | FE1398 | carbamazepine 10,11-dihydro-10-hydroxy |                            | 29331-92-8 | 10   | 3    | 35*         | A             | <i>metabolite</i>                                |
| 14. | FE1397 | carbamazepine 10,11-dihydroxy          |                            | 3564-73-6  | 10   | 3    | 35*         | A             | <i>metabolite</i>                                |
| 15. | FE1396 | carbamazepine 10,11-epoxide            |                            | 36507-30-9 | 10   | 3    | 35*         | A             | <i>metabolite</i>                                |
| 16. | FE1394 | carbamazepine 2-hydroxy                | carbamazepine 2-hydroxy    | 68011-66-5 | 1    | 0.3  | 35*         | A             | <i>metabolite</i>                                |
| 17. | FE4185 | celiprolol                             |                            | 56980-93-9 | 1    | 0.3  | 35*         | A             | <i>beta blocker</i>                              |
| 18. | FE3600 | climbazole                             |                            | 38083-17-9 | 1    | 0.3  | 35*         | A             | <i>antifungal</i>                                |
| 19. | FE3157 | clindamycin                            |                            | 18323-44-9 | 1    | 0.3  | 35*         | A             | <i>antibiotic</i>                                |
| 20. | FE1390 | clofibrac acid                         | Kyselina klofibrová        | 882-09-7   | 2    | 0.7  | 35*         | A             | <i>fibrate</i>                                   |
| 21. | FE3605 | cyclamate                              |                            | 100-88-9   | 10   | 3    | 35*         | A             | <i>sugar substitute</i>                          |
| 22. | FE4135 | cyclophosphamide                       |                            | 50-18-0    | 1    | 0.3  | 35*         | A             | <i>chemotherapeutic agent</i>                    |
| 23. | FE1385 | diclofenac                             |                            | 15307-86-5 | 10   | 3    | 35*         | A             | <i>NSAID</i>                                     |
| 24. | FE1386 | diclofenac-4'-hydroxy                  | 4'-hydroxy-diclofenac      | 64118-84-9 | 20   | 7    | 35*         | A             | <i>metabolite</i>                                |
| 25. | FE3040 | erythromycin                           |                            | 114-07-8   | 10   | 3    | 35*         | A             | <i>antibiotic</i>                                |
| 26. | FE3615 | ethylparaben                           |                            | 120-47-8   | 1    | 0.3  | 35*         | A             | <i>cosmetic and pharmaceutical preservatives</i> |
| 27. | FE3176 | fluconazole                            |                            | 86386-73-4 | 1    | 0.3  | 35*         | A             | <i>antifungal</i>                                |
| 28. | FE3240 | furosemide                             |                            | 54-31-9    | 10   | 3    | 35*         | A             | <i>diuretic</i>                                  |
| 29. | FE3250 | gabapentin                             |                            | 60142-96-3 | 1    | 0.3  | 35*         | A             | <i>antiepileptic</i>                             |
| 30. | FE3098 | gemfibrozil                            |                            | 25812-30-0 | 1    | 0.3  | 35*         | A             | <i>fibrate</i>                                   |
| 31. | FE3242 | hydrochlorothiazide                    |                            | 58-93-5    | 2    | 0.7  | 35*         | A             | <i>diuretic</i>                                  |
| 32. | FE3247 | chloramphenicol                        |                            | 56-75-7    | 1    | 0.3  | 35*         | A             | <i>antibiotic</i>                                |
| 33. | FE1365 | ibuprofen                              |                            | 15687-27-1 | 10   | 3    | 35*         | A             | <i>NSAID</i>                                     |
| 34. | FE1366 | ibuprofen-2-hydroxy                    |                            | 51146-55-5 | 20   | 7    | 35*         | A             | <i>metabolite</i>                                |
| 35. | FE1367 | ibuprofen-carboxy                      | Carboxy-ibuprofen          | 15935-54-3 | 5    | 1,5  | 35*         | A             | <i>metabolite</i>                                |

|     |        |                          |                          |             |    |     |     |   |                                                          |
|-----|--------|--------------------------|--------------------------|-------------|----|-----|-----|---|----------------------------------------------------------|
| 36. | FE3105 | iohexol                  |                          | 66108-95-0  | 10 | 3   | 35* | A | <i>contrast agent</i>                                    |
| 37. | FE3578 | ioimeprol                |                          | 78649-41-9  | 10 | 3   | 35* | A | <i>contrast agent</i>                                    |
| 38. | FE3102 | iopamidol                |                          | 60166-93-0  | 10 | 3   | 35* | A | <i>contrast agent</i>                                    |
| 39. | FE3104 | iopromid                 |                          | 73334-07-3  | 10 | 3   | 35* | A | <i>contrast agent</i>                                    |
| 40. | FE3186 | irbesartan               |                          | 138402-11-6 | 2  | 0.7 | 35* | A | <i>antihypertensive</i>                                  |
| 41. | FE4190 | ivermectin               |                          | 70288-86-7  | 5  | 1.5 | 35* | A | <i>antiparasitic,<br/>antihelmintics</i>                 |
| 42. | FE3097 | ketoprofen               |                          | 22071-15-4  | 1  | 0.3 | 35* | A | <i>NSAID</i>                                             |
| 43. | FE4195 | lamotrigine              |                          | 84057-84-1  | 10 | 3   | 35* | A | <i>antiepileptic</i>                                     |
| 44. | FE3042 | lincomycin               |                          | 154-21-2    | 1  | 0.3 | 35* | A | <i>antibiotic</i>                                        |
| 45. | FE4200 | lovastatin               |                          | 75330-75-5  | 2  | 0.7 | 35* | A | <i>lipid-modifying agent</i>                             |
| 46. | FE3192 | memantine                |                          | 19982-08-2  | 2  | 0.7 | 35* | A | <i>psychoanalytic (anti-<br/>dementia agent)</i>         |
| 47. | FE3620 | methylparaben            |                          | 99-76-3     | 5  | 1.5 | 35* | A | <i>cosmetic and<br/>pharmaceutical<br/>preservatives</i> |
| 48. | FE3193 | metoprolol               |                          | 51384-51-1  | 1  | 0.3 | 35* | A | <i>beta blocker</i>                                      |
| 49. | FE3095 | naproxene                |                          | 22204-53-1  | 10 | 3   | 35* | A | <i>NSAID</i>                                             |
| 50. | FE3096 | naproxene-o-<br>dimethyl | o-desmethyl<br>naproxene | 52079-10-4  | 5  | 1.5 | 35* | A | <i>metabolite</i>                                        |
| 51. | FE1399 | oxcarbazepine            |                          | 28721-07-5  | 10 | 3   | 35* | A | <i>metabolite</i>                                        |
| 52. | FE1800 | paracetamol              |                          | 103-90-2    | 2  | 0.7 | 35* | A | <i>pain killer</i>                                       |
| 53. | FE3101 | paraxanthine             |                          | 611-59-6    | 5  | 1.5 | 35* | A | <i>metabolite of caffeine</i>                            |
| 54. | FE3229 | penicillin G             |                          | 61-33-6     | 1  | 0.3 | 35* | A | <i>antibiotic</i>                                        |
| 55. | FE4215 | phenazone                |                          | 60-80-0     | 2  | 0.7 | 35* | A | <i>NSAID</i>                                             |
| 56. | FE2180 | primidone                |                          | 125-33-7    | 1  | 0.3 | 35* | A | <i>antiepileptic</i>                                     |
| 57. | FE4170 | propranolol              |                          | 525-66-6    | 1  | 0.3 | 35* | A | <i>beta blocker</i>                                      |
| 58. | FE3630 | propylparaben            |                          | 94-13-3     | 5  | 1.5 | 35* | A | <i>cosmetic and<br/>pharmaceutical<br/>preservatives</i> |
| 59. | FE4205 | propyphenazone           |                          | 479-92-5    | 1  | 0.3 | 35* | A | <i>NSAID</i>                                             |
| 60. | FE5218 | saccharin                |                          | 81-07-2     | 10 | 3   | 35* | A | <i>sugar substitute</i>                                  |
| 61. | FE4175 | salbutamol               |                          | 18559-94-9  | 1  | 0.3 | 35* | A | <i>antiasthmatics</i>                                    |
| 62. | FE4210 | simvastatin              |                          | 79902-63-9  | 10 | 3   | 35* | A | <i>lipid-modifying<br/>agent<br/>beta blocker</i>        |
| 63. | FE3211 | sotalol                  |                          | 3930-20-9   | 1  | 0.3 | 35* | A |                                                          |
| 64. | FE3280 | sulfadiazine             |                          | 68-35-9     | 1  | 0.3 | 35* | A | <i>antibiotic</i>                                        |
| 65. | FE3233 | sulfamerazine            |                          | 127-79-7    | 1  | 0.3 | 35* | A | <i>antibiotic</i>                                        |
| 66. | FE3065 | sulfamethazine           |                          | 57-68-1     | 1  | 0.3 | 35* | A | <i>antibiotic</i>                                        |
| 67. | FE1400 | sulfamethoxazole         |                          | 723-46-6    | 1  | 0.3 | 35* | A | <i>antibiotic</i>                                        |
| 68. | FE5242 | sulfanilamide            | sulphonamide             | 63-74-1     | 10 | 3   | 35* | A | <i>antibiotic</i>                                        |

|     | MI     | NAME           | OTHER NAME | CAS#            | LOQ  | LOD  | Uncertainty | Accreditation | Description                                           |
|-----|--------|----------------|------------|-----------------|------|------|-------------|---------------|-------------------------------------------------------|
|     |        |                |            |                 | ng/l | ng/l | %           |               |                                                       |
| 69. | FE3075 | sulphapyridine |            | 144-83-2        | 1    | 0.3  | 35*         | A             | <i>antibiotic</i>                                     |
| 70. | FE3310 | tiamulin       |            | 55297-95-5      | 1    | 0.3  | 35*         | A             | <i>veterinary antibiotic</i>                          |
| 71. | FE3215 | tramadol       |            | 27203-92-5      | 1    | 0.3  | 35*         | A             | <i>pain killer</i>                                    |
| 72. | FE3245 | triclocarban   |            | 101-20-2        | 1    | 0.3  | 35*         | A             | <i>antibacterial agent</i>                            |
| 73. | FE3085 | triclosan      |            | 3380-34-5       | 10   | 3    | 35*         | A             | <i>antibacterial agent</i>                            |
| 74. | FE3080 | trimethoprim   |            | 738-70-5        | 10   | 3    | 35*         | A             | <i>antibiotic</i>                                     |
| 75. | FE3306 | Valsartan acid |            | 164265-78-<br>5 | 2    | 0.7  | 35*         | A             | <i>metabolite of valsartan<br/>(antihypertensive)</i> |
| 76. | FE3249 | warfarin       |            | 81-81-2         | 1    | 0.3  | 35*         | A             | <i>anticoagulant</i>                                  |
